# Supplementary material for: The Performance of Flash Replenishment Contrast-Enhanced Ultrasound for the Qualitative Assessment of Kidney Lesions in Patients with Chronic Kidney Disease
Source: MDPI journal article supplement (doi:10.3390/jcm12206494), 2023-10-12
Supplement: s1 [file s1]

## Supplemental Materials

### **The performance of flash-replenishment contrast enhanced ultrasound for the qualitative assessment of kidney lesions in patients with chronic kidney disease**

Rachel W. Walmer <sup>1,\*</sup>, Victor S. Ritter <sup>2</sup>, Anush Sridharan <sup>1,3</sup>, Sandeep K. Kasoji <sup>1,4</sup>, Ersan Altun <sup>5</sup>, Ellie Lee <sup>5</sup>, Kristen Olinger <sup>5</sup>, Sean Wagner <sup>5</sup>, Roshni Radhakrishna <sup>6</sup>, Kennita A. Johnson <sup>1</sup>, W. Kimryn Rathmell <sup>7</sup>, Bahjat Qaqish <sup>2</sup>, Paul A. Dayton <sup>1</sup>, and Emily H. Chang <sup>6</sup>

<sup>1</sup>Joint Department of Biomedical Engineering, University of North Carolina at Chapel Hill and North Carolina State University, Chapel Hill, NC, USA

<sup>2</sup>Department of Biostatistics, University of North Carolina at Chapel Hill, Chapel Hill, NC, USA

<sup>3</sup>Fox Chase Cancer Center, Philadelphia, PA, USA

<sup>4</sup>Triangle Biotechnology, Durham, NC, USA

<sup>5</sup>Department of Radiology, University of North Carolina at Chapel Hill, Chapel Hill, NC, USA

<sup>6</sup>Department of Medicine, University of North Carolina at Chapel Hill, Chapel Hill, NC, USA

<sup>7</sup>Department of Medicine, Vanderbilt University, Nashville, TN, USA

\*Corresponding author

Corresponding Author: Rachel W. Walmer

Address: 10010 Mary Ellen Jones CB 7575, 116 Manning Drive, Chapel Hill, NC, 27599

Email: [rachel.w.walmer@unc.edu](mailto:rachel.w.walmer@unc.edu)

## SUPPLEMENTAL FIGURES AND TABLES

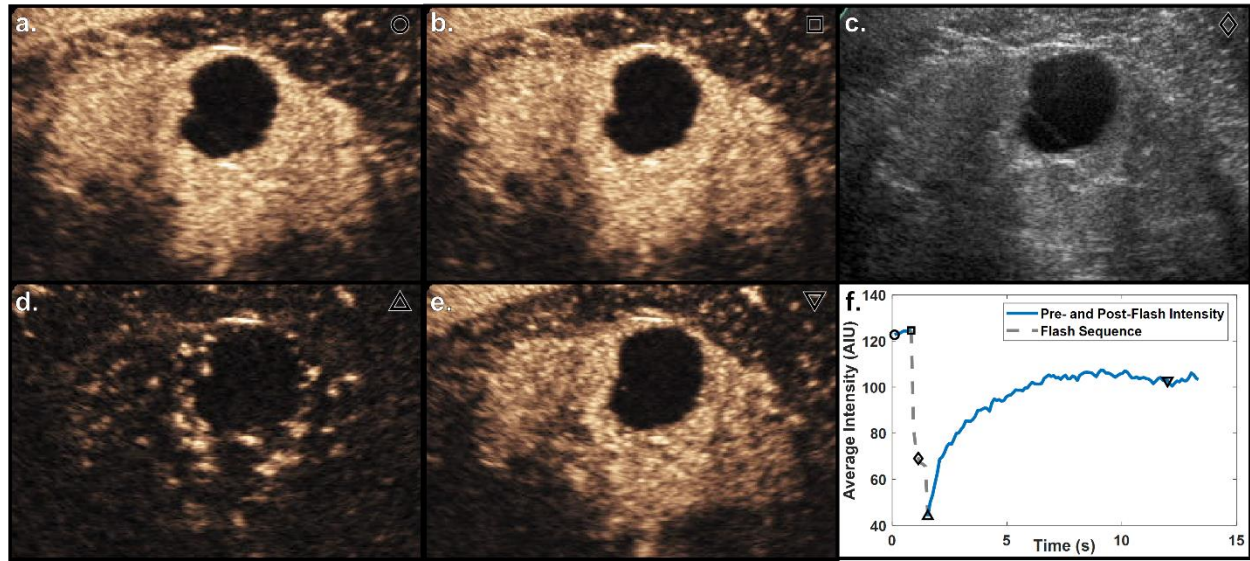

**Figure S1.** A series of images demonstrating the flash replenishment imaging technique. Symbols in the upper right-hand corner of a-e) correspond to their location on the graph of intensity vs. time in f). a) Contrast intensity after reaching steady state equilibrium via a constant infusion of Perflutren Lipid Microspheres, b) the intensity immediately prior (pre-flash) to initiating a high pressure pulse to clear contrast from the kidney, c) the high pressure pulse, or flash, is generated by briefly switching to color doppler imaging, d) the first frame (post-flash) after returning to a low-pressure contrast imaging mode, where contrast can be seen beginning to refill the kidney, e) the contrast intensity as it returns to the original steady state value, and f) a graph of intensity over time in the kidney which represents the flash replenishment imaging technique.



**Table S1.** Characteristics of all enrolled patients

| <b>Patient Characteristics (N = 60)</b> | <b>N (%)</b> |
|-----------------------------------------|--------------|
| <b>Age (years)</b>                      |              |
| Mean $\pm$ SD                           | 60 $\pm$ 14  |
| <b>Sex</b>                              |              |
| Male                                    | 37 (61.7%)   |
| Female                                  | 23 (38.3%)   |
| <b>Race or Ethnicity</b>                |              |
| Black                                   | 30 (50.0%)   |
| White                                   | 29 (48.3%)   |
| Hispanic                                | 1 (1.7%)     |
| <b>CKD Stage</b>                        |              |
| CKD II                                  | 9 (15%)      |
| CKD III                                 | 18 (30%)     |
| CKD IV                                  | 11 (18.3%)   |
| CKD V                                   | 5 (8.3%)     |
| ESKD                                    | 17 (28.3%)   |
| <b>Initial Imaging Study</b>            |              |
| Non-contrast CT                         | 3 (5.0%)     |
| Contrast CT                             | 2 (3.3%)     |
| Contrast CT with renal mass protocol    | 12 (20%)     |
| Non-contrast MRI                        | 3 (5.0%)     |
| Contrast MRI                            | 3 (5.0%)     |
| Conventional US                         | 37 (61.7%)   |

Abbreviations: CKD (chronic kidney disease), ESKD (end-stage kidney disease), CT (computed tomography), MRI (magnetic resonance imaging), US (ultrasound)

**Table S2.** Number, diagnosis, laterality, and size of analyzed lesions

| <b>Lesion Information (N = 63)</b>                                     | <b>N (%)</b>                |
|------------------------------------------------------------------------|-----------------------------|
| <b>Lesion Diagnosis</b>                                                |                             |
| Clear cell RCC                                                         | 2 (3.2%)                    |
| Acquired cystic disease RCC                                            | 4 (6.4%)                    |
| Papillary RCC                                                          | 2 (3.2%)                    |
| Clear cell papillary RCC                                               | 2 (3.2%)                    |
| Tubulocystic RCC                                                       | 1 (1.6%)                    |
| Oncocytoma                                                             | 1 (1.6%)                    |
| <i>Imaging Surveillance</i>                                            |                             |
| Stable: Regressed/no concerning features                               | 40 (63.5%)                  |
| Suspicious: Stable, but persistent concerning features                 | 8 (12.7%)                   |
| Progressed: Progressed features                                        | 3 (4.7%)                    |
| <b>Laterality of Lesion<sup>1</sup></b>                                |                             |
| Left                                                                   | 30 (47.6%)                  |
| Right                                                                  | 33 (52.4%)                  |
| <b>Lesion Measurements by Imaging (cm<sup>3</sup>, cm)<sup>2</sup></b> |                             |
| Average Volume $\pm$ SD (range)                                        | 10.8 $\pm$ 14.3 (0.15-85.4) |
| Median Volume (IQR)                                                    | 5.97 (11.4)                 |
| Average Minimum Diameter (range)                                       | 2.06 (0.60-4.40)            |
| Average Maximum Diameter (range)                                       | 2.72 (0.80-6.90)            |

<sup>1</sup>Lesion laterality is indicated based on each individual lesion/case, regardless of if bilateral disease was present in patients with multiple lesions imaged for this study. <sup>2</sup>Some values are reported to two decimal places to retain a minimum of two significant figures for numbers other than exact numbers.

Abbreviations: RCC (renal cell carcinoma), IQR (interquartile range)

**Table S3.** Inter-reader agreement on lesion characterization

|                 | <b>Reader 1</b> | <b>Malignant<br/>(n = 36*)</b> | <b>Indeterminate<br/>(n = 5*)</b> | <b>Benign<br/>(n = 22*)</b> | <b>P-value</b> |
|-----------------|-----------------|--------------------------------|-----------------------------------|-----------------------------|----------------|
| <b>Reader 2</b> | Malignant       | 26 (72%)                       | 2 (40%)                           | 1 (4.5%)                    | 0.2            |
|                 | Indeterminate   | 10 (28%)                       | 1 (20%)                           | 1 (4.5%)                    |                |
|                 | Benign          | 0 (0%)                         | 2 (40%)                           | 20 (91%)                    |                |
| <b>Reader 3</b> | Malignant       | 27 (75%)                       | 1 (20%)                           | 2 (9.1%)                    | 0.3            |
|                 | Indeterminate   | 6 (17%)                        | 1 (20%)                           | 2 (9.1%)                    |                |
|                 | Benign          | 3 (8.3%)                       | 3 (60%)                           | 18 (82%)                    |                |
| <b>Reader 4</b> | Malignant       | 27 (75%)                       | 1 (20%)                           | 4 (18%)                     | 0.4            |
|                 | Indeterminate   | 6 (17%)                        | 4 (80%)                           | 0 (0%)                      |                |
|                 | Benign          | 3 (8.3%)                       | 0 (0%)                            | 18 (82%)                    |                |

  

|                 | <b>Reader 2</b> | <b>Malignant<br/>(n = 29*)</b> | <b>Indeterminate<br/>(n = 12*)</b> | <b>Benign<br/>(n = 22*)</b> | <b>P-value</b> |
|-----------------|-----------------|--------------------------------|------------------------------------|-----------------------------|----------------|
| <b>Reader 3</b> | Malignant       | 23 (79%)                       | 6 (50%)                            | 1 (4.5%)                    | 0.7            |
|                 | Indeterminate   | 4 (14%)                        | 4 (33%)                            | 1 (4.5%)                    |                |
|                 | Benign          | 2 (6.9%)                       | 2 (17%)                            | 20 (91%)                    |                |
| <b>Reader 4</b> | Malignant       | 26 (90%)                       | 4 (33%)                            | 2 (9.1%)                    | 0.8            |
|                 | Indeterminate   | 2 (6.9%)                       | 6 (50%)                            | 2 (9.1%)                    |                |
|                 | Benign          | 1 (3.4%)                       | 2 (17%)                            | 18 (82%)                    |                |

  

|                 | <b>Reader 3</b> | <b>Malignant<br/>(n = 30*)</b> | <b>Indeterminate<br/>(n = 9*)</b> | <b>Benign<br/>(n = 24*)</b> | <b>P-value</b> |
|-----------------|-----------------|--------------------------------|-----------------------------------|-----------------------------|----------------|
| <b>Reader 4</b> | Malignant       | 25 (83%)                       | 5 (56%)                           | 2 (8.3%)                    | 0.6            |
|                 | Indeterminate   | 4 (13%)                        | 2 (22%)                           | 4 (17%)                     |                |
|                 | Benign          | 1 (3.3%)                       | 2 (22%)                           | 18 (75%)                    |                |

\*Percentages totaled by column, for each individual reader compared to the section header

**Table S4.** Contrast ultrasound data quality assessment of interpreted cases (N = 65) by reader

| <b>Suggestion</b>       | <b>Reader 1</b> | <b>Reader 2</b> | <b>Reader 3</b> | <b>Reader 4</b> |
|-------------------------|-----------------|-----------------|-----------------|-----------------|
| No suggested changes    | 48              | 24              | 47              | 48              |
| Higher contrast dose    | 3               | 13              | 3               | 4               |
| Lower contrast dose     | 0               | 1               | 0               | 0               |
| Longer imaging          | 1               | 0               | 0               | 2               |
| Adjust gain             | 1               | 2               | 6               | 2               |
| Different view          | 11              | 21              | 8               | 1               |
| Other major adjustments | 0               | 0               | 0               | 3               |
| Other minor adjustments | 1               | 4               | 1               | 5               |
